# Supplementary material
Source: Springer Nature journal article supplement (https://www.springermedizin.de/resource/supplementary/13012_2011_567_MOESM4_ESM.pdf/9630184)
Supplement: MOESM4 [file 9630184]

| <b>Domain(s)</b>                          | <b>Example behaviour-change technique</b>                           |
|-------------------------------------------|---------------------------------------------------------------------|
| Social/professional role and identity     | Social processes of encouragement, pressure, and support            |
| Social influences                         | Modeling/demonstration of prescribing behavior by other colleagues  |
| Knowledge                                 | Information regarding prescribing errors and the outcomes of errors |
| Skills                                    | Rehearsal of appropriate prescribing behaviors                      |
| Environmental context and resources       | Environmental changes to facilitate prescribing                     |
| Memory, attention, and decision processes | Self-monitoring of prescribing behavior                             |
| Behavioral regulation                     | Prompts, triggers, and cues                                         |
| Beliefs about capabilities                | Feedback about prescribing errors made                              |
| Beliefs about consequences                | Persuasive communication                                            |
